# Supplementary material
Source: MDPI journal article supplement (https://www.mdpi.com/2673-9801/1/1/6)
Supplement: s1 [file s1]

# The art of inducing hypoxia

Helen Rinderknecht <sup>1</sup>, Sabrina Ehnert <sup>1\*</sup>, Bianca Braun<sup>1</sup>, Tina Histing <sup>1</sup>, Andreas K. Nussler <sup>1</sup> and Caren Linne-mann <sup>1</sup>

<sup>1</sup> Siegfried Weller Research Institute, BG Trauma Center Tübingen, Department of Trauma and Reconstructive Surgery, University of Tübingen, Schnarrenbergstr. 95, D-72076 Tübingen, Germany

\* Correspondence: Sabrina.ehnert@med.uni-tuebingen.de

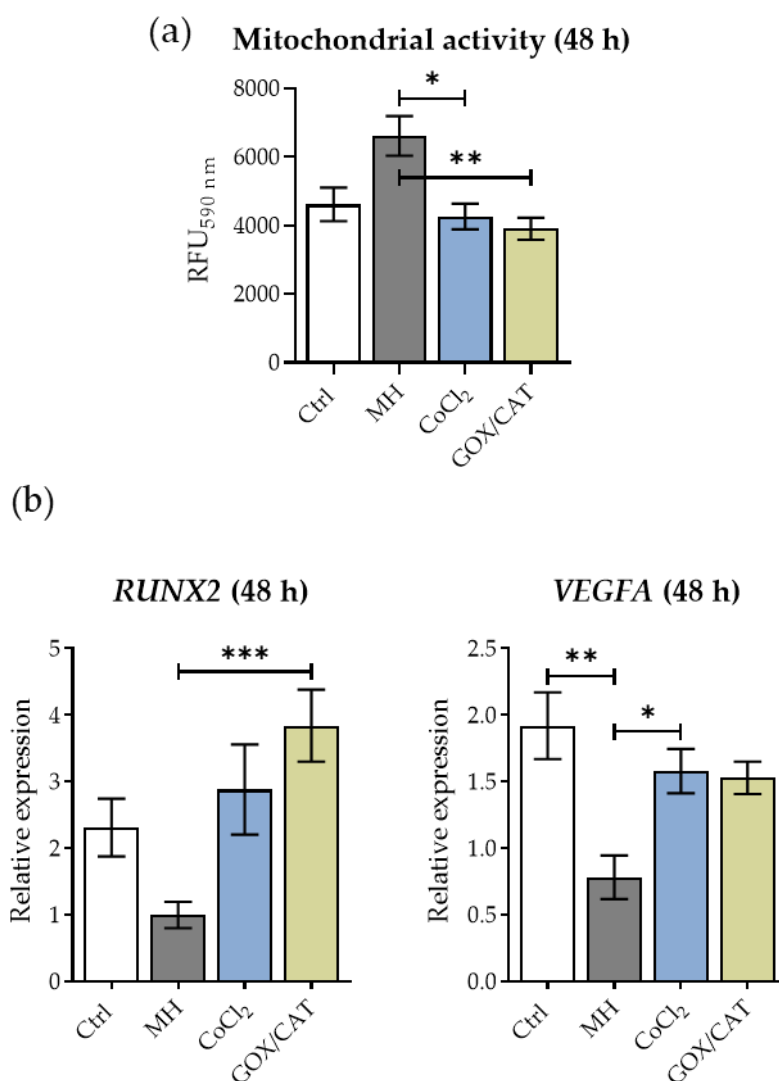

**Supplementary Figure S1:** 48 h measurements of *in vitro* fracture hematomas (mitochondrial activity, *RUNX2* and *VEGFA* expression). *In vitro* hematomas were cultivated in common aerobic conditions without additional stimulus (Ctrl), with increased MH, 0.4 mM CoCl<sub>2</sub> and the enzymatic GOX/CAT system for 48 h. (a) Mitochondrial activity after 48 h in *in vitro* fracture hematomas (b) Gene expression analysis for targets *VEGFA*, and *RUNX2* after 48 h in *in vitro* fracture hematomas (N=3, n≥3). Statistics were made using non-parametric Kruskal-Wallis Tests with \*  $p < 0.05$ , \*\*  $p < 0.01$ , \*\*\*  $p < 0.001$ .

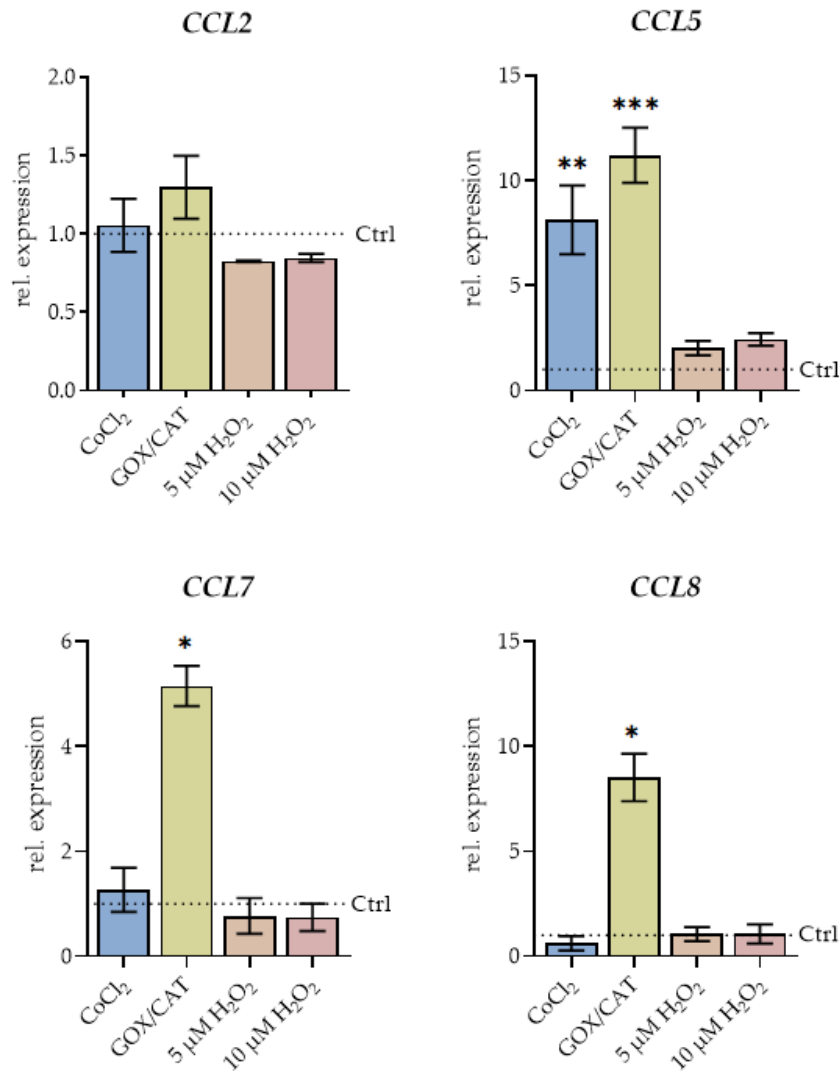

**Supplementary Figure S2:** Cytokine expression of osteogenic cells in response to H<sub>2</sub>O<sub>2</sub>.

Osteogenic cells were cultivated in common aerobic conditions without additional stimulus (Ctrl), with 0.1 mM CoCl<sub>2</sub>, enzymatic GOX/CAT system and 5/10 μM H<sub>2</sub>O<sub>2</sub> for 24 h. Gene expression was analyzed for *CCL2*, *CCL5*, *CCL7* and *CCL8*. (N=3, n=3). Statistics were done by non-parametric Dunn's multi-ple comparison test comparing the Ctrl condition with each stimulus with \* p≤0.05, \*\* p≤0.01, \*\*\* p<0.001. Data are shown as mean ± SEM.

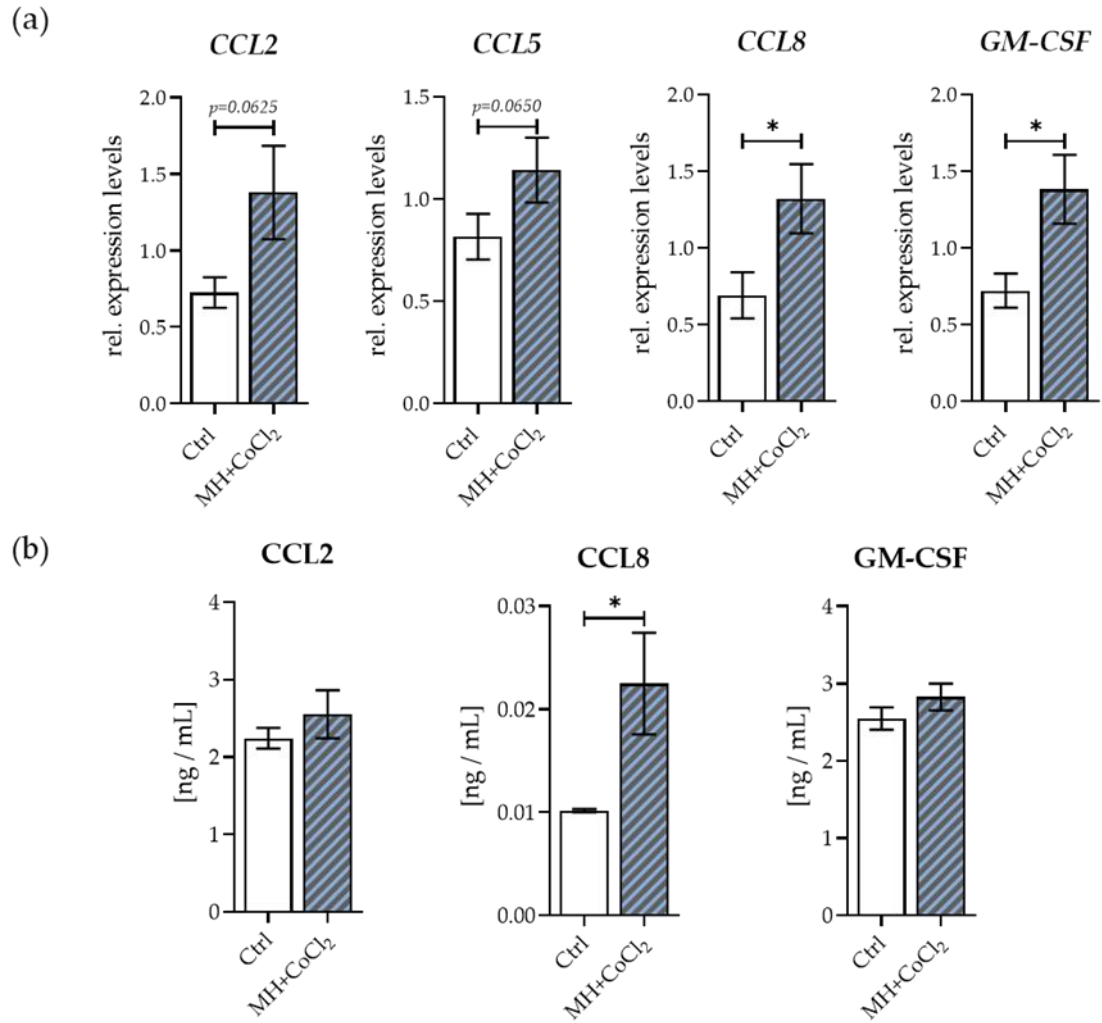

**Supplementary Figure S3:** Chemokine expression and release of osteogenic cells by combination medium height and CoCl<sub>2</sub> to induce hypoxia. SCP-1 cells were cultivated in common aerobic conditions without additional stimulus (Ctrl) and with increased medium height for 24 h and afterwards for 2 h with 0.1 mM CoCl<sub>2</sub>. (a) Gene expression analysis of *CCL2*, *CCL5*, *CCL8* and *GM-CSF* (N=3, n=3). (b) Release of cytokines *CCL2*, *CCL8* and *GM-CSF* was analyzed by ELISA (N=3, n=3). Statistics were done by non-parametric Whitney-U tests with \*  $p \leq 0.05$ . Data are shown as mean  $\pm$  SEM.
